# Supplementary material for: Structures and interaction energies of stacked graphene–nucleobase complexes
Source: Royal Society of Chemistry journal article supplement (doi:10.1039/b718788b), 2008-01-01

# Supplementary material to "Structures and interaction energies of stacked graphene-nucleobase complexes"

Jens Antony<sup>1</sup> and Stefan Grimme<sup>1,\*</sup>

<sup>1</sup> *Universität Münster Organisch-Chemisches Institut,  
Corrensstrasse 40, D-48149 Münster, Germany*

(Dated: February 1, 2008)

---

\*Corresponding author: [grimmes@uni-muenster.de](mailto:grimmes@uni-muenster.de)

## Contents

- Figure S1: B97-D/TZV(d,p) three dimensional potential energy surface of adenine on  $C_{96}H_{24}$ .
- Figure S2: B97-D/TZV(d,p) three dimensional potential energy surface of thymine on  $C_{96}H_{24}$ .
- Figure S3: B97-D/TZV(d,p) three dimensional potential energy surface of cytosine on  $C_{96}H_{24}$ .
- Figure S4: B97-D/TZV(d,p) three dimensional potential energy surface of guanine on  $C_{96}H_{24}$ .
- Figure S5: B97-D/TZV(d,p) three dimensional potential energy surface of uracil on  $C_{96}H_{24}$ .
- Figure S6: Intermolecular interaction energies of adenine ... graphene sheet complexes with different size.
- Figure S7: Intermolecular interaction energies of thymine ... graphene sheet complexes with different size.
- Figure S8: Intermolecular interaction energies of cytosine ... graphene sheet complexes with different size.
- Figure S9: Intermolecular interaction energies of guanine ... graphene sheet complexes with different size.
- Figure S10: Intermolecular interaction energies of uracil ... graphene sheet complexes with different size.

FIG. S1: B97-D/TZV(d,p) three dimensional potential energy surface of adenine on  $C_{96}H_{24}$ . The structure corresponds to the origin of the plot. Axis labels in  $\text{\AA}$ , contour levels in kcal/mol.

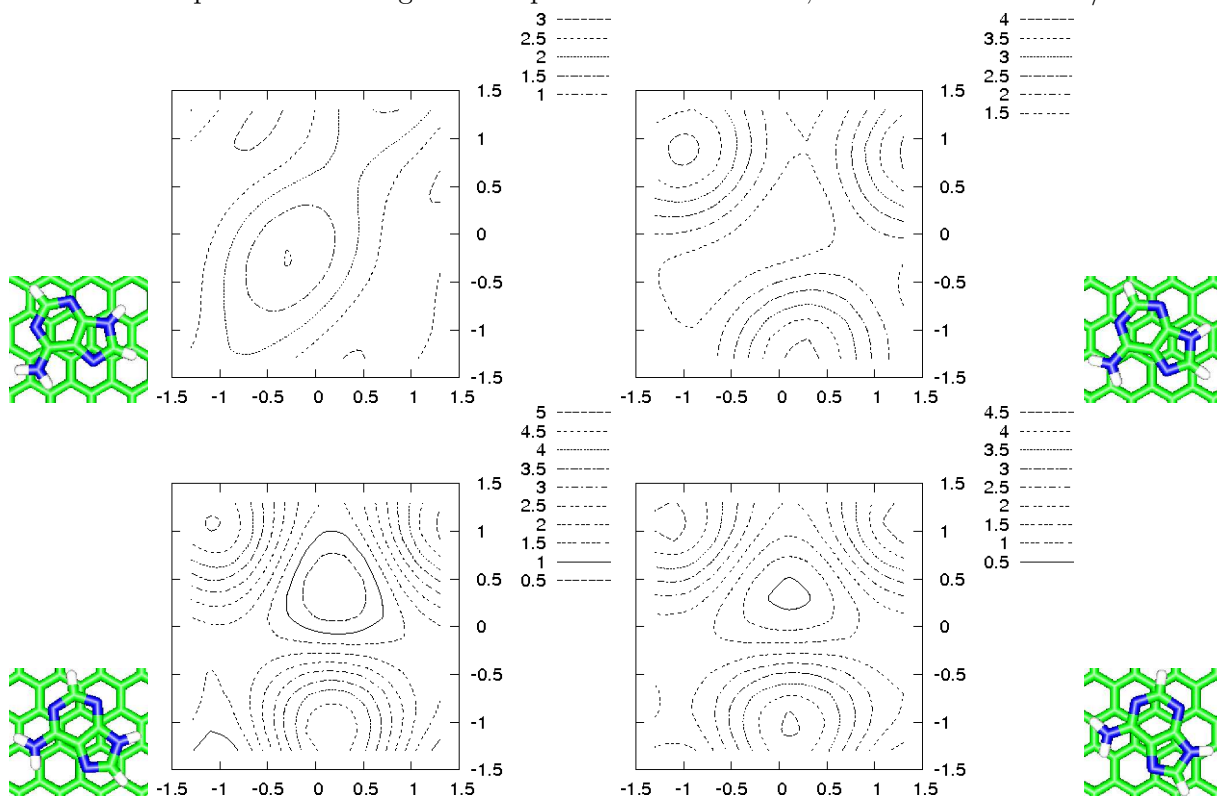

FIG. S2: B97-D/TZV(d,p) three dimensional potential energy surface of thymine on  $C_{96}H_{24}$ .

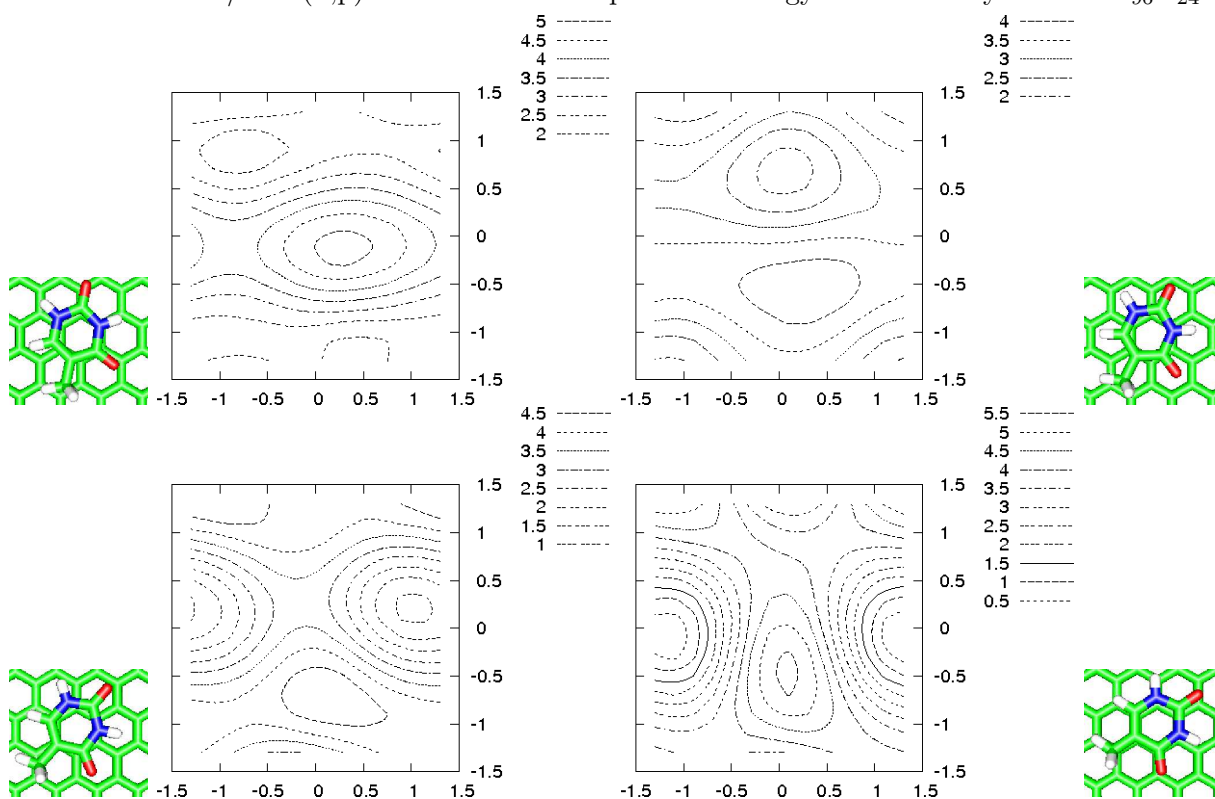

FIG. S3: B97-D/TZV(d,p) three dimensional potential energy surface of cytosine on  $C_{96}H_{24}$ .

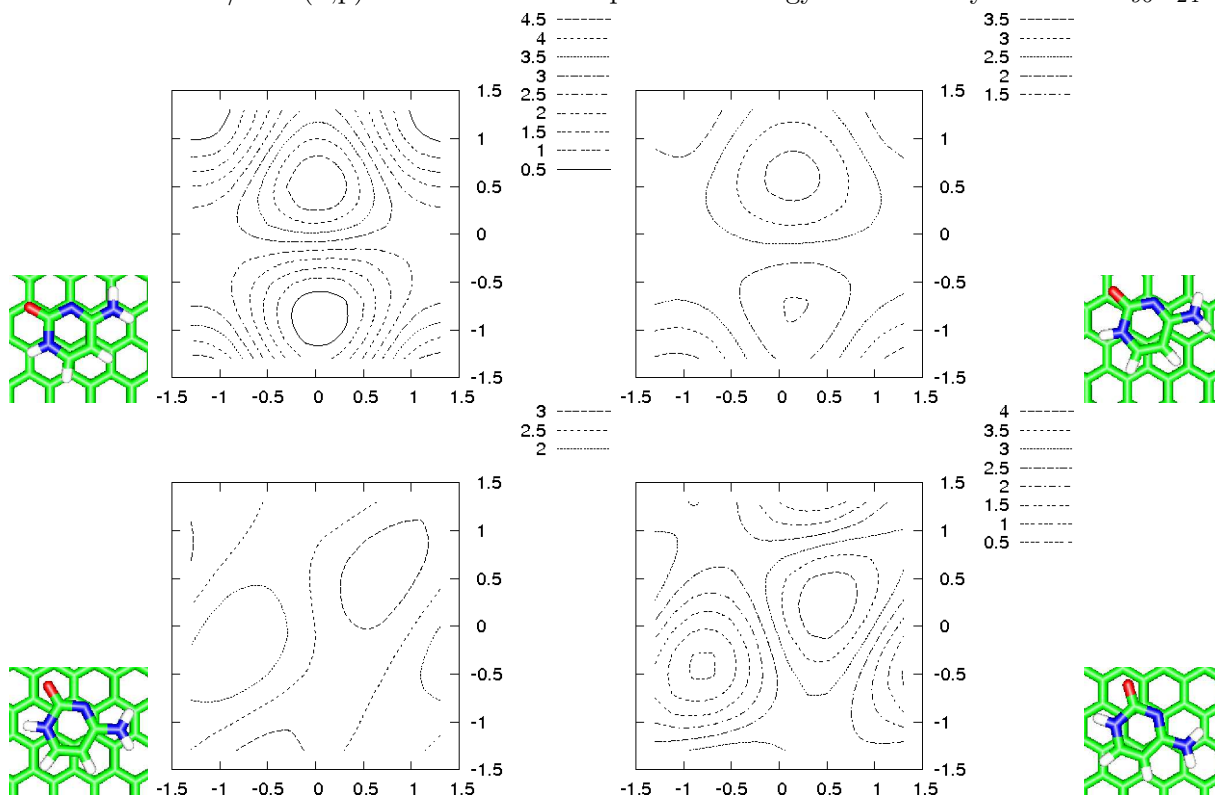

FIG. S4: B97-D/TZV(d,p) three dimensional potential energy surface of guanine on  $C_{96}H_{24}$ .

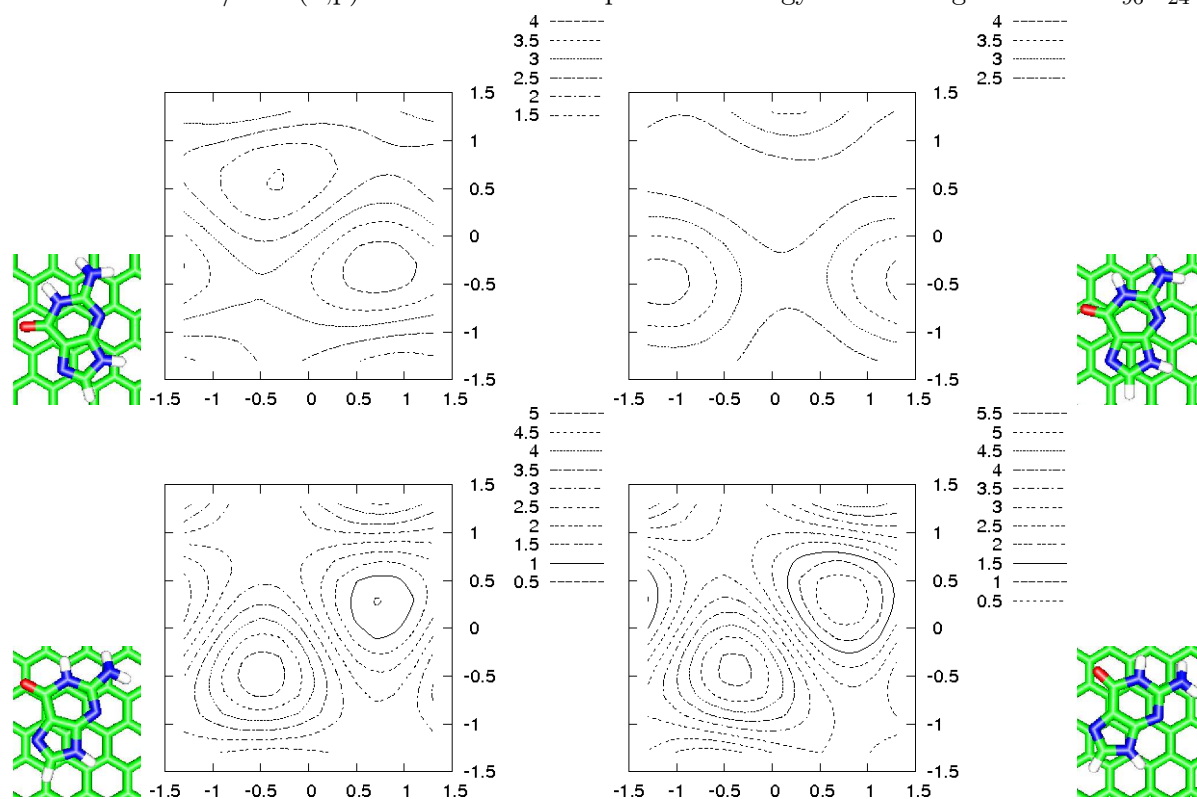

FIG. S5: B97-D/TZV(d,p) three dimensional potential energy surface of uracil on  $C_{96}H_{24}$ .

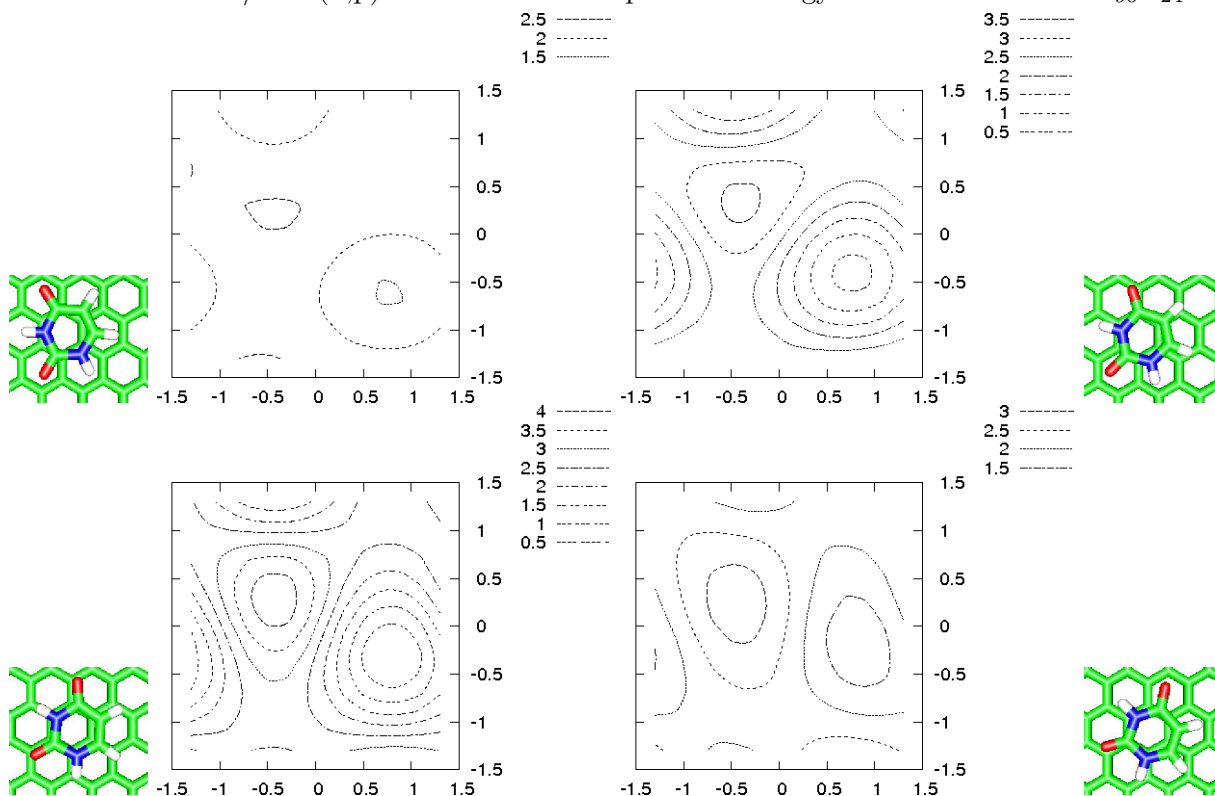

FIG. S6: Intermolecular interaction energies of adenine ... graphene sheet complexes with different size.  $n$  is the number of the carbon atoms in the sheet.

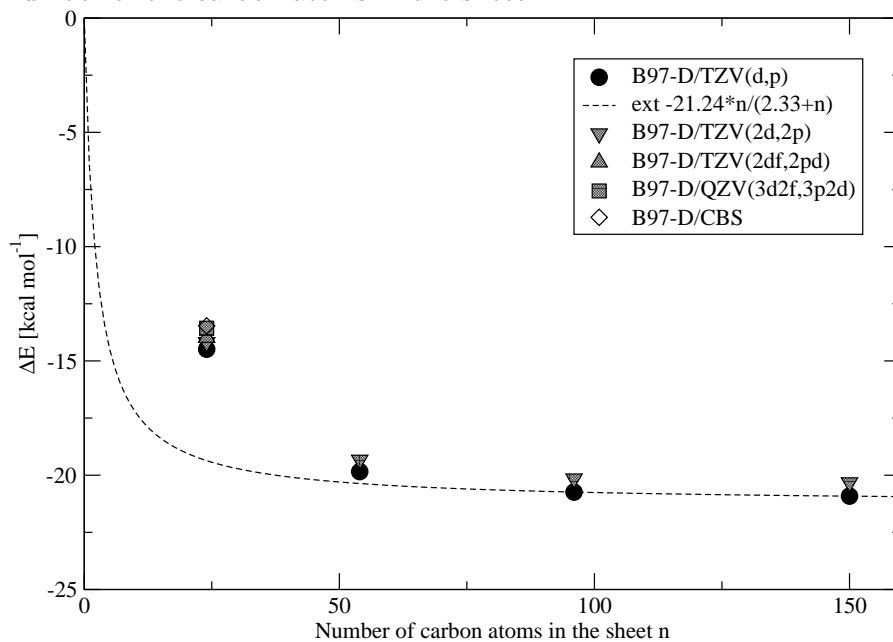

FIG. S7: Intermolecular interaction energies of thymine ... graphene sheet complexes with different size.

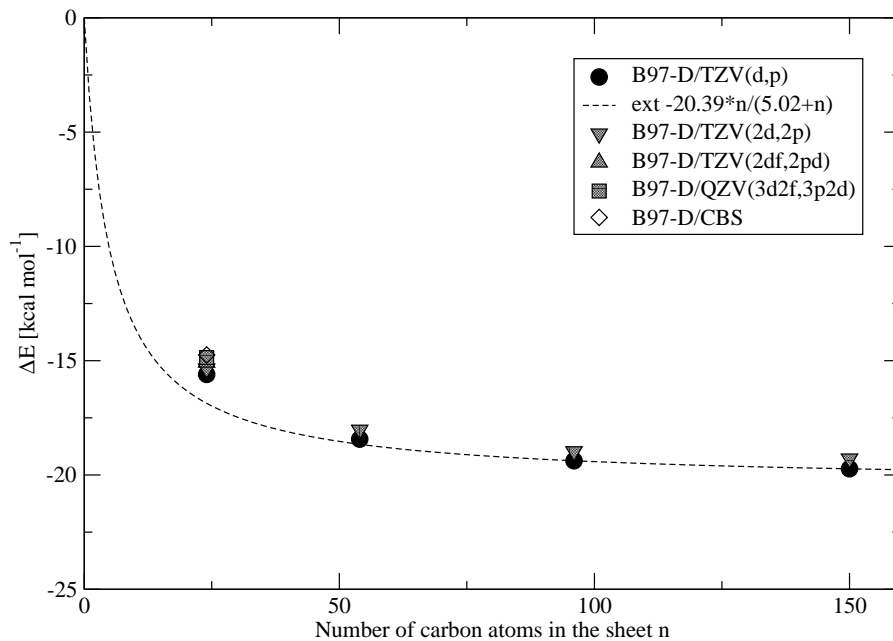

FIG. S8: Intermolecular interaction energies of cytosine ... graphene sheet complexes with different size.

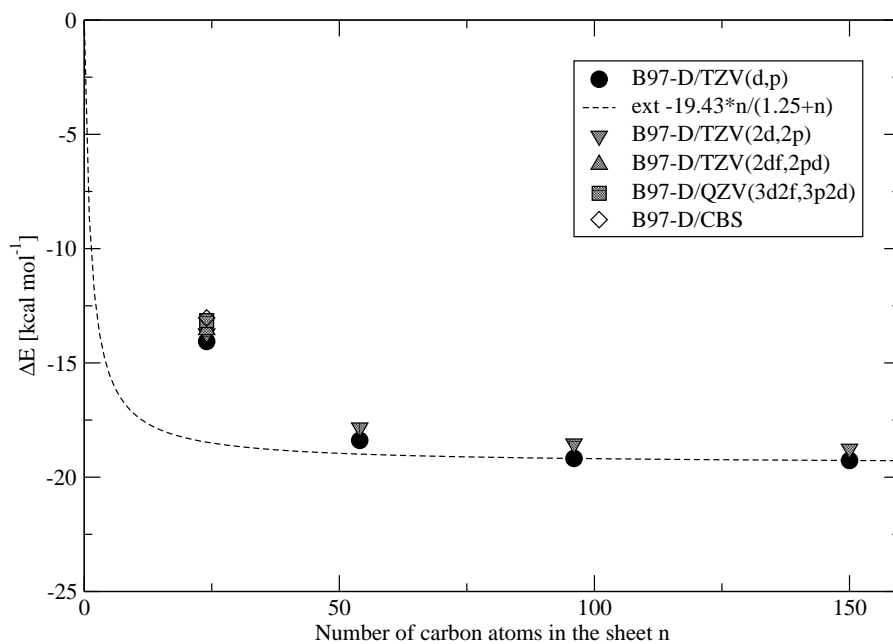

FIG. S9: Intermolecular interaction energies of guanine ... graphene sheet complexes with different size.

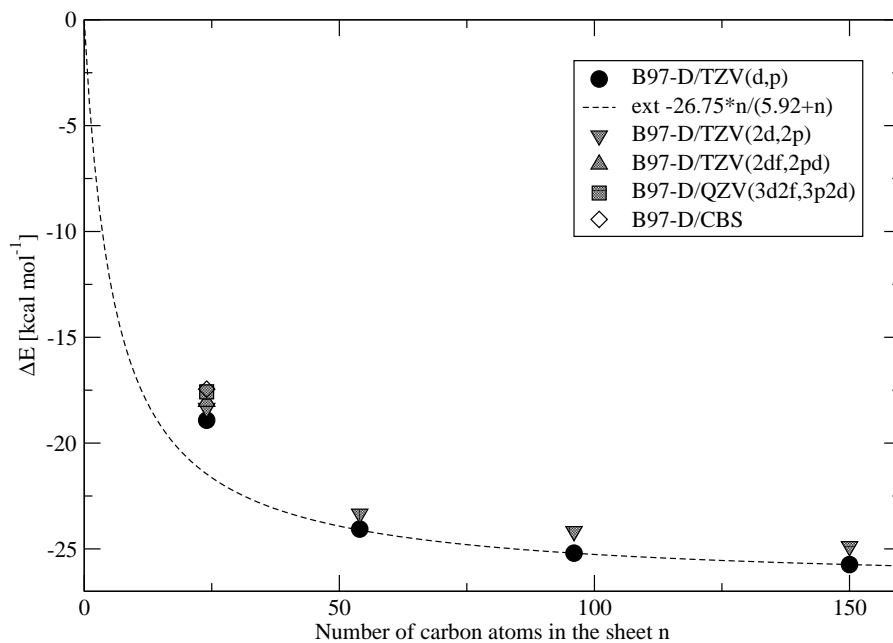

FIG. S10: Intermolecular interaction energies of uracil ... graphene sheet complexes with different size.

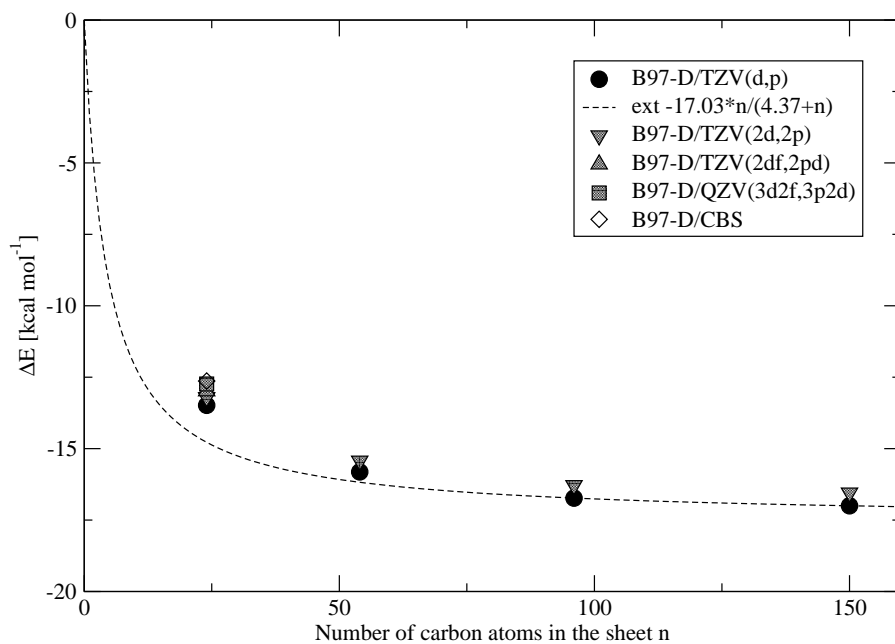

Supplement: b718788b.pdf [file b718788b.pdf]
